# Supplementary material
Source: PubMed Central journal article supplement (PMC2834455)

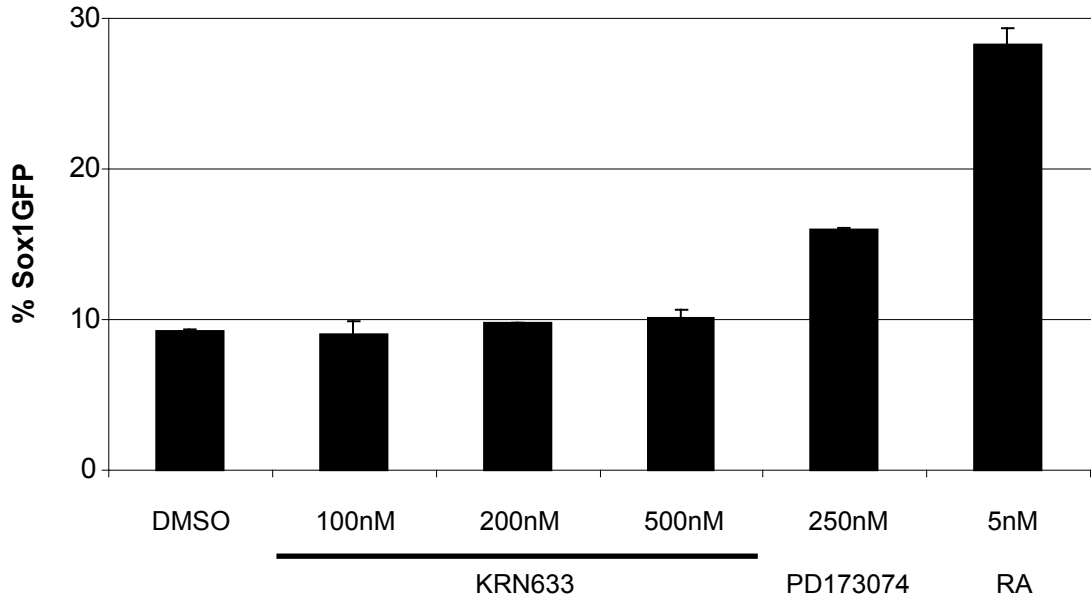

Supplement: supp_137.6.881_043117FigS5.pdf [file supp_137.6.881_043117FigS5.pdf]

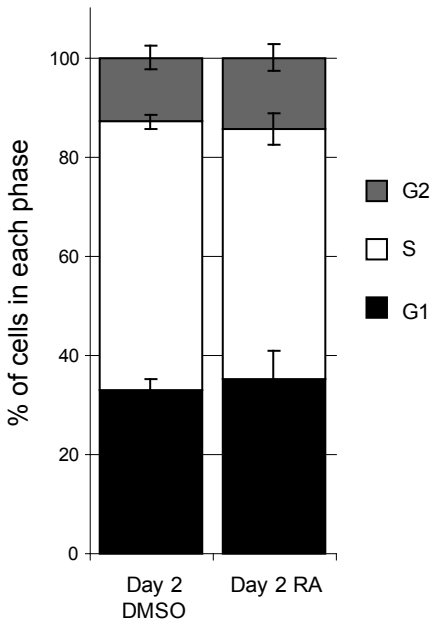

Supplement: supp_137.6.881_043117FigS6.pdf [file supp_137.6.881_043117FigS6.pdf]
